# Supplementary material for: Trends in cigarette pricing and purchasing patterns in a sample of US smokers: findings from the ITC US Surveys (2002-2011)
Source: HighWire-hosted journal article supplement (doi:10.1136/tobaccocontrol-2013-051376), 2014-06-10
Supplement: tobaccocontrol-2013-051376supp_appendix.pdf [file tobaccocontrol-2013-051376supp_appendix.pdf]

Appendix 1: Data Values for Figure 3

| 3a. Cigarette Purchase Locations, Overall |                                                    |                             |                              |                   |       |
|-------------------------------------------|----------------------------------------------------|-----------------------------|------------------------------|-------------------|-------|
| Wave (Year)                               | Convenience store, gas station, newsstand, milkbar | Grocery and discount stores | Tobacco outlets, smoke shops | Low tax locations | Other |
| 2002                                      | 56.6                                               | 19.6                        | 12.3                         | 3.6               | 6.9   |
| 2003                                      | 57                                                 | 17.5                        | 12.4                         | 4.5               | 7.2   |
| 2004                                      | 57.8                                               | 15.3                        | 15                           | 4.6               | 5.6   |
| 2005-6                                    | 57                                                 | 16.1                        | 16.2                         | 3.7               | 5.6   |
| 2006-7                                    | 59.3                                               | 15.5                        | 14.8                         | 4.3               | 4.8   |
| 2007-8                                    | 61.1                                               | 15.5                        | 15.4                         | 3.7               | 3.5   |
| 2008-9                                    | 58.9                                               | 14.4                        | 15.6                         | 5.2               | 4.1   |
| 2010-11                                   | 59.7                                               | 12                          | 17.1                         | 5.9               | 4     |

| 3b. Cigarette Purchase Locations, Cartons |                                                    |                             |                              |                   |       |
|-------------------------------------------|----------------------------------------------------|-----------------------------|------------------------------|-------------------|-------|
| Wave (Year)                               | Convenience store, gas station, newsstand, milkbar | Grocery and discount stores | Tobacco outlets, smoke shops | Low tax locations | Other |
| 2002                                      | 35.7                                               | 25.7                        | 21.2                         | 9.6               | 7.2   |
| 2003                                      | 39.6                                               | 22.2                        | 19.9                         | 10.7              | 7.7   |
| 2004                                      | 37.5                                               | 17.7                        | 25.5                         | 11.9              | 6.6   |
| 2005-6                                    | 36.8                                               | 20.1                        | 27.2                         | 10.2              | 5.5   |
| 2006-7                                    | 42                                                 | 18.7                        | 22.8                         | 11.3              | 4.7   |
| 2007-8                                    | 44.1                                               | 17                          | 24                           | 11.1              | 3.5   |
| 2008-9                                    | 41                                                 | 15.7                        | 24.4                         | 13.6              | 4.5   |
| 2010-11                                   | 39.1                                               | 15.3                        | 23.7                         | 14.7              | 5.8   |

| 3c. Cigarette Purchase Locations, Packs |                                                    |                             |                              |                   |       |
|-----------------------------------------|----------------------------------------------------|-----------------------------|------------------------------|-------------------|-------|
| Wave (Year)                             | Convenience store, gas station, newsstand, milkbar | Grocery and discount stores | Tobacco outlets, smoke shops | Low tax locations | Other |
| 2002                                    | 70.2                                               | 15.9                        | 6.7                          | 0.7               | 5.9   |
| 2003                                    | 69.7                                               | 14.3                        | 7.4                          | 1                 | 6.5   |
| 2004                                    | 72.9                                               | 13.2                        | 8.1                          | 0.6               | 4.7   |
| 2005-6                                  | 71.2                                               | 13.1                        | 8.7                          | 0.2               | 6.1   |
| 2006-7                                  | 72.3                                               | 14.2                        | 8.3                          | 0.4               | 4.1   |
| 2007-8                                  | 74                                                 | 14.8                        | 7.3                          | 0.1               | 2.9   |
| 2008-9                                  | 71.5                                               | 13.6                        | 8.6                          | 1.7               | 3.6   |
| 2010-11                                 | 75.3                                               | 10.2                        | 11.4                         | 0.4               | 3.3   |
